# Supplementary figures and images for: Characterizing clinical outcomes and factors associated with conduction gaps in VISITAG SURPOINT‐guided catheter ablation for atrial fibrillation
Source: PubMed Central journal article supplement — J Arrhythm. 2021 May 7;37(3):574–83. doi: 10.1002/joa3.12544 (PMC8207404; doi:10.1002/joa3.12544), 2021-05-07

## Supplementary Figure 1

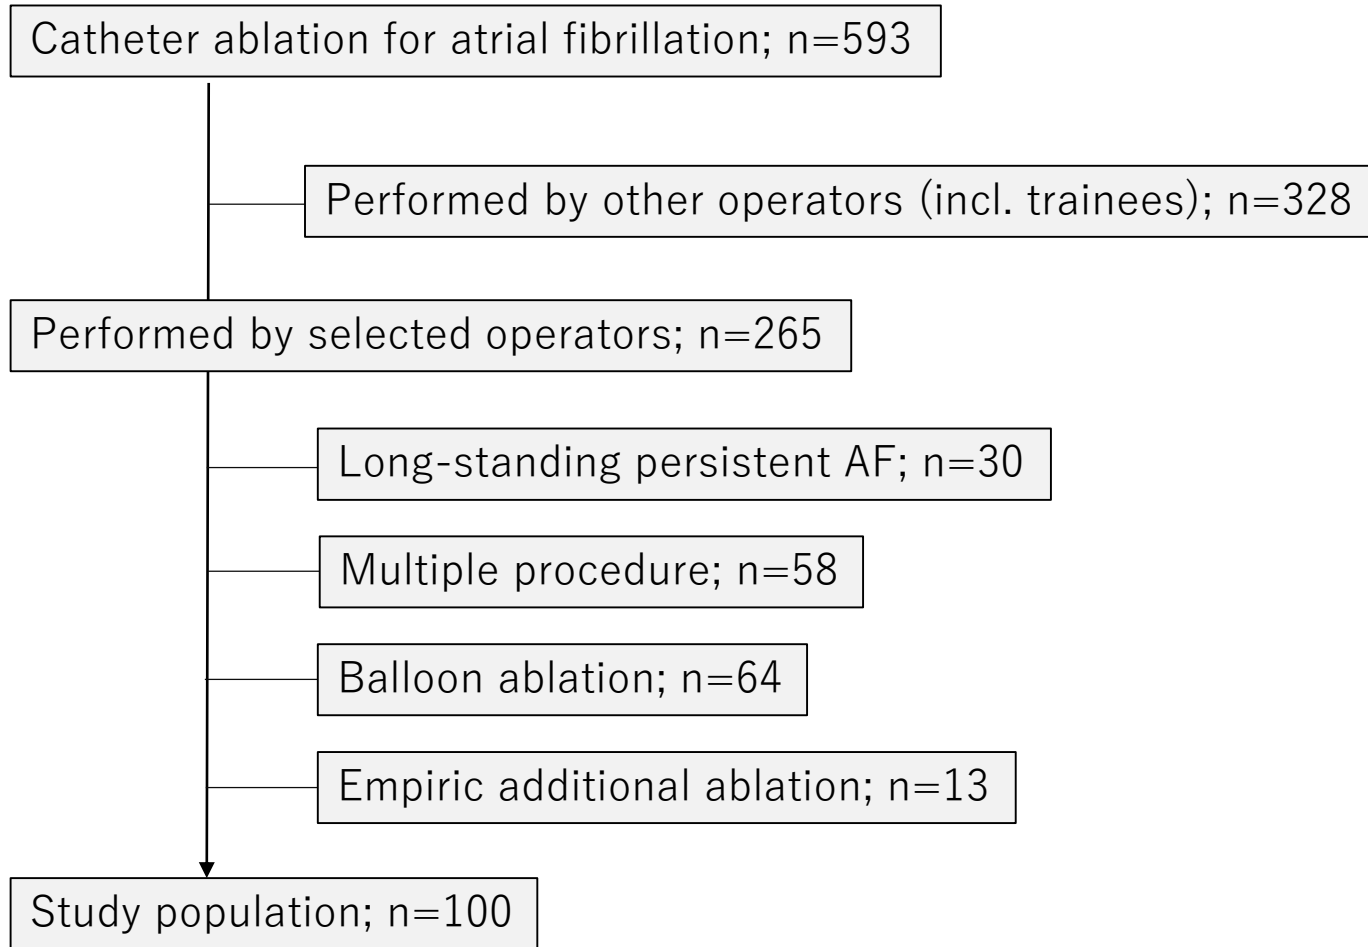

## Supplementary Figure 2

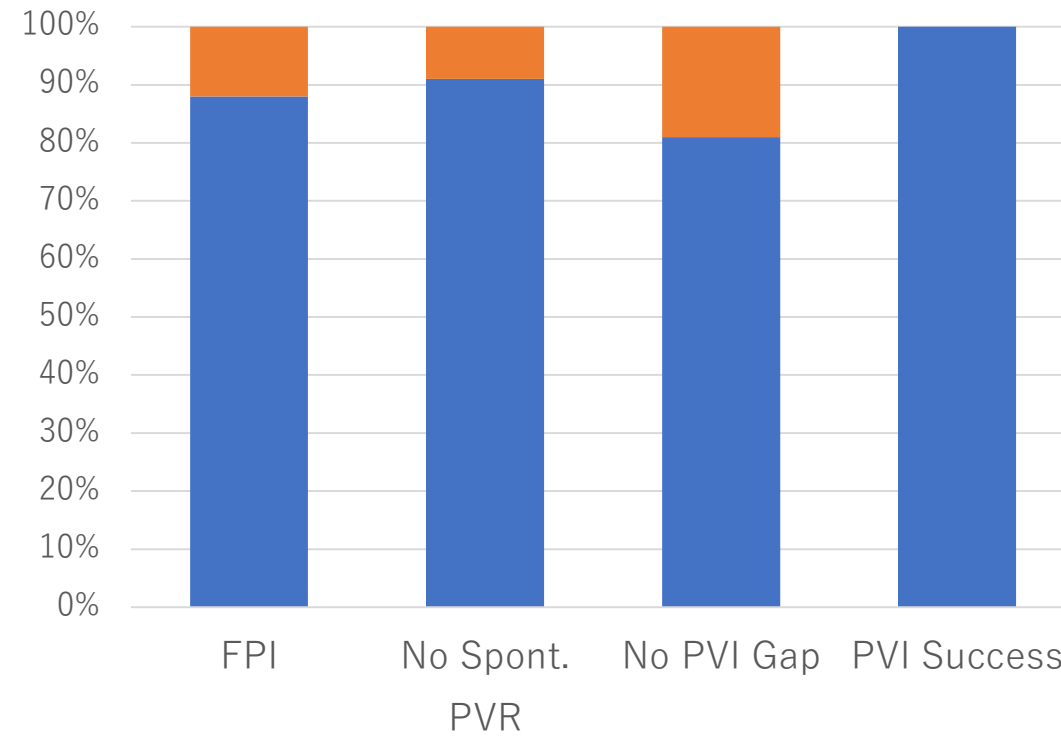

Supplement: JOA3-37-574-s001.pdf [file JOA3-37-574-s001.pdf]
